# Supplementary material
Source: PubMed Central journal article supplement (PMC5718699)
Supplement: jc.2017-01411.sf1.pdf [file jc.2017-01411.sf1.pdf]

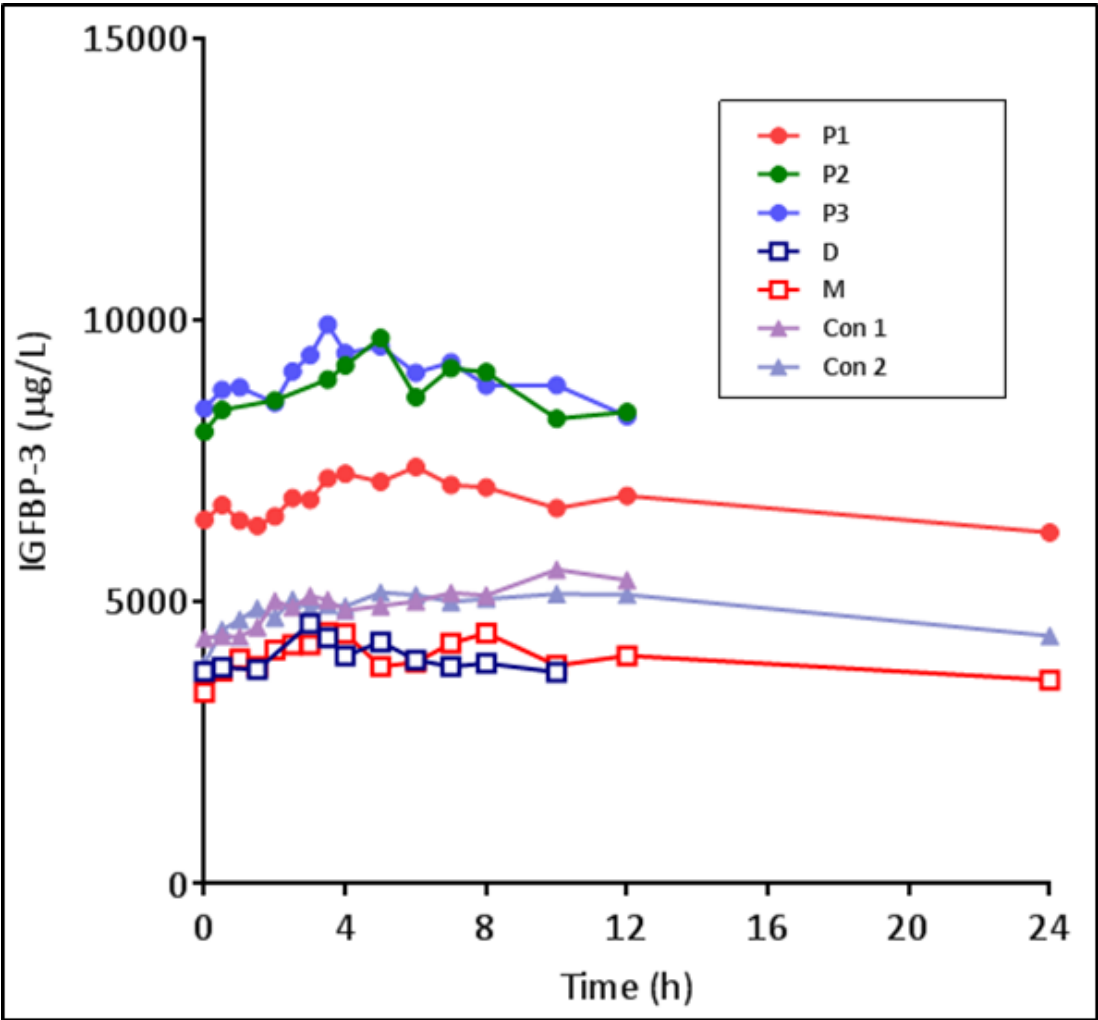

**Supplemental Figure 1.** IGFBP-3 response to a SC injection of 120 µg /kg rhIGF-1 in PAPP-A2 deficient patients (P1, P3 and P3), their heterozygous relatives (M and D) and healthy controls (Con 1 and 2).
